# Supplementary material for: Robust metabolomic age prediction based on a wide selection of metabolites
Source: bioRxiv or medRxiv preprint supplement (doi:10.1101/2023.06.03.23290933), 2023-11-09

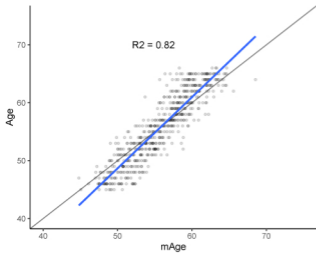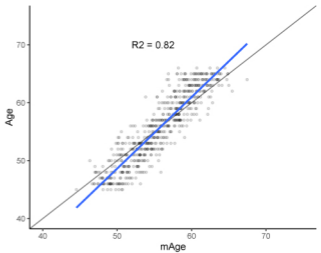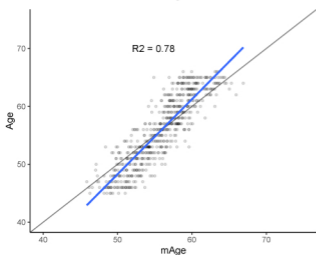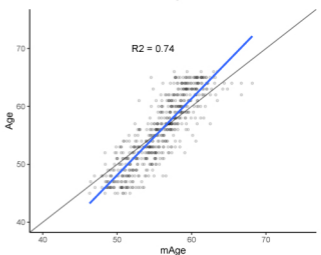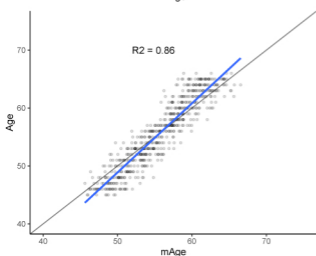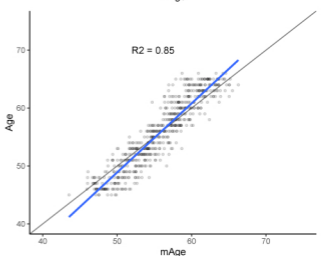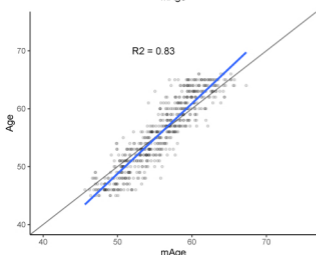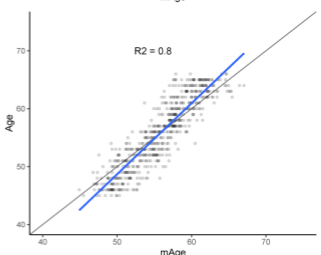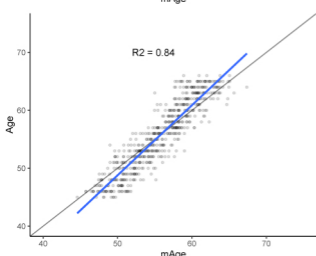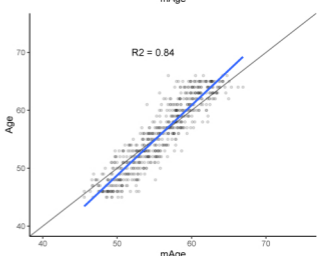

Supplement: Supplementary file [file media-3.pdf]
